# Supplementary material for: HERV-K(HML7) Integrations in the Human Genome: Comprehensive Characterization and Comparative Analysis in Non-Human Primates
Source: MDPI journal article supplement (doi:10.3390/biology10050439), 2021-05-14

## Supplementary file S2. Neighbor joining phylogenetic analyses of individual HML7 proviral portions:

a) provirus-associated LTRs

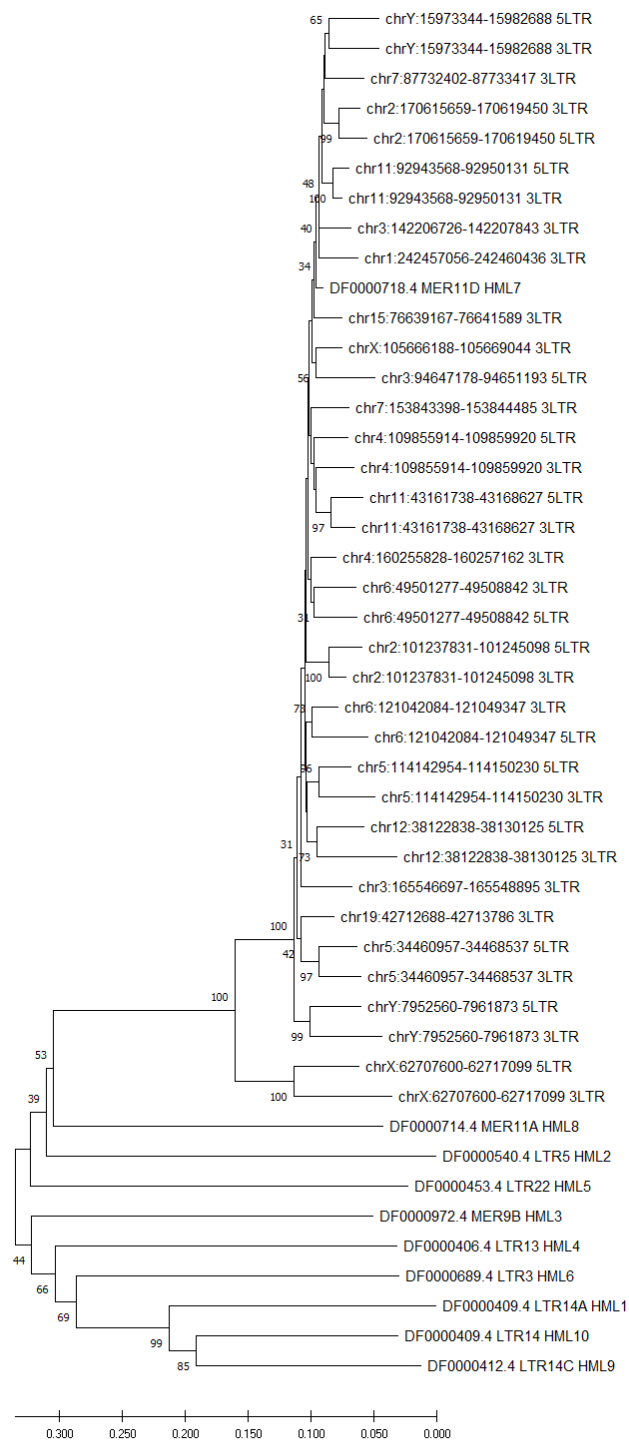

b) *gag-pro* genes

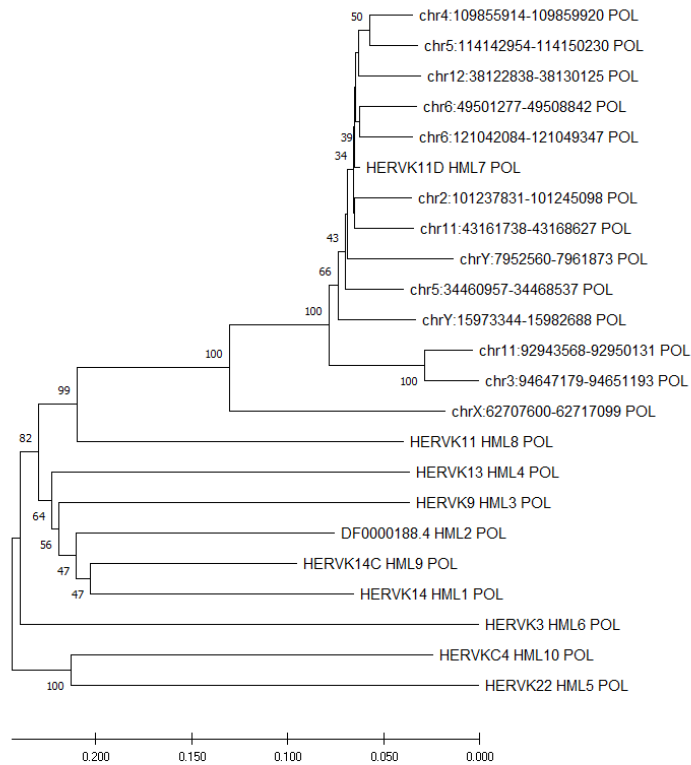

c) *pol* gene

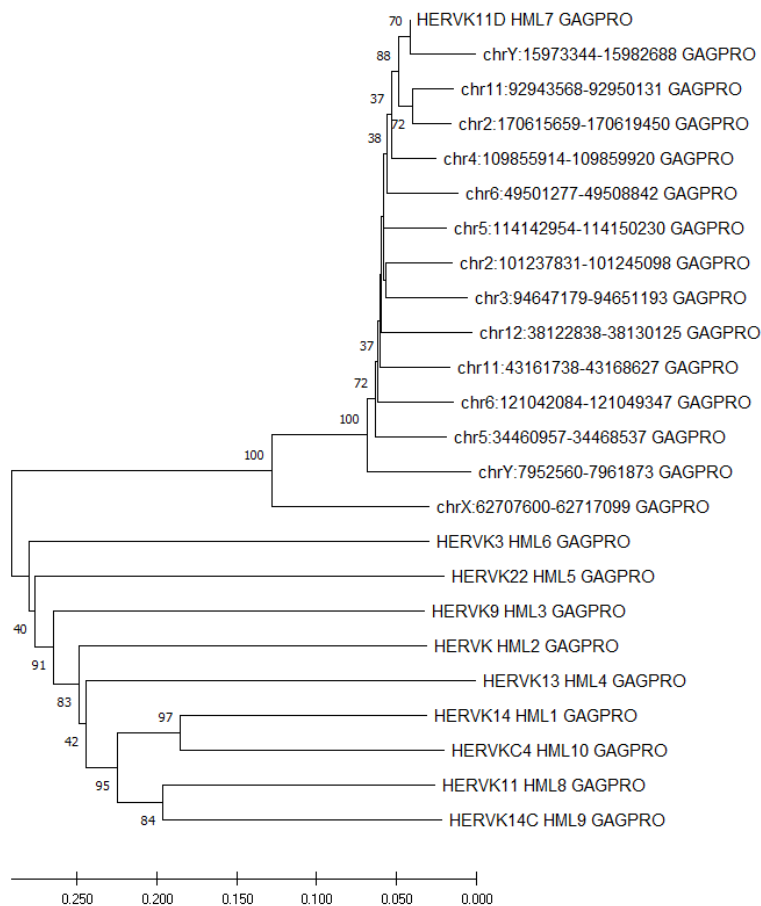

d) *env* gene

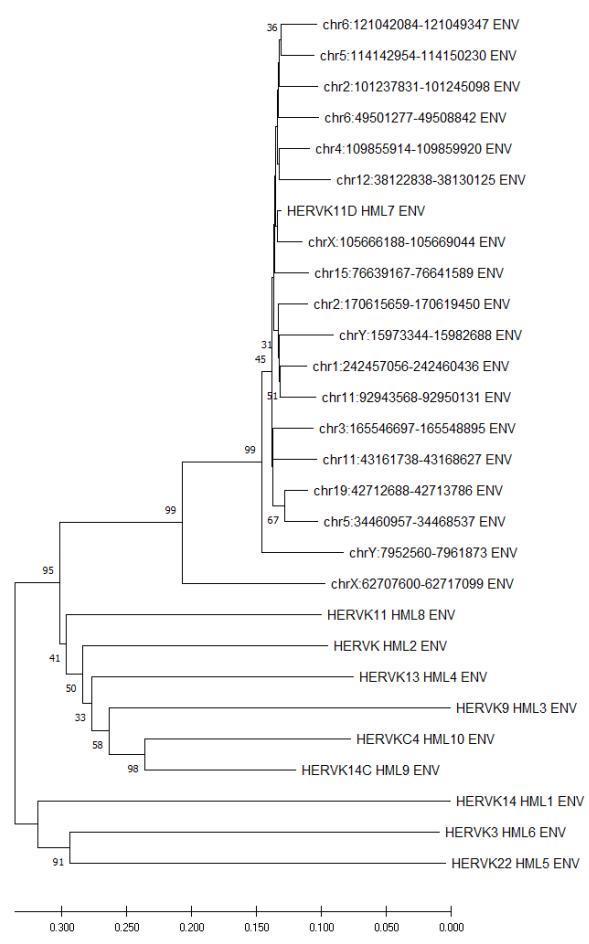

Supplement: s1 [file s1]
