# Supplementary material for: HERV-K(HML7) Integrations in the Human Genome: Comprehensive Characterization and Comparative Analysis in Non-Human Primates
Source: MDPI journal article supplement (doi:10.3390/biology10050439), 2021-05-14
Supplement: s1 [file s1]

| chromosome | start     | end       | strand |
|------------|-----------|-----------|--------|
| chr1       | 9124260   | 9125061   | +      |
| chr1       | 12705236  | 12706103  | +      |
| chr1       | 46756512  | 46757382  | +      |
| chr1       | 49801979  | 49802860  | +      |
| chr1       | 59921250  | 59922156  | +      |
| chr1       | 70751600  | 70752473  | +      |
| chr1       | 89018103  | 89018958  | +      |
| chr1       | 91466416  | 91467282  | +      |
| chr1       | 101555484 | 101556347 | +      |
| chr1       | 102789849 | 102790716 | -      |
| chr1       | 119786221 | 119786997 | -      |
| chr1       | 147103237 | 147104108 | +      |
| chr1       | 194415875 | 194416748 | +      |
| chr1       | 221196566 | 221197440 | -      |
| chr1       | 223303543 | 223304412 | -      |
| chr1       | 248882051 | 248882924 | -      |
| chr2       | 116288174 | 116289070 | +      |
| chr2       | 123112737 | 123113595 | -      |
| chr2       | 139912644 | 139913516 | -      |
| chr2       | 186375135 | 186376029 | +      |
| chr2       | 208482219 | 208483079 | -      |
| chr2       | 210430307 | 210431185 | +      |
| chr2       | 228714598 | 228715472 | -      |
| chr3       | 6306935   | 6307809   | -      |
| chr3       | 20921429  | 20922302  | -      |
| chr3       | 35173081  | 35173952  | +      |
| chr3       | 55248733  | 55249674  | -      |
| chr3       | 84896402  | 84897275  | -      |
| chr3       | 106360640 | 106361513 | -      |
| chr3       | 151808620 | 151809492 | -      |
| chr3       | 165676473 | 165677333 | -      |
| chr3       | 191267466 | 191268349 | -      |
| chr4       | 54408991  | 54409888  | -      |
| chr4       | 58817735  | 58818677  | +      |
| chr4       | 75954591  | 75955464  | +      |
| chr4       | 76281767  | 76282659  | -      |
| chr4       | 79591919  | 79592822  | -      |
| chr4       | 87291010  | 87291906  | -      |
| chr4       | 92217751  | 92218615  | +      |
| chr4       | 97968745  | 97969555  | +      |
| chr4       | 98479300  | 98480167  | +      |

|      |           |           |   |
|------|-----------|-----------|---|
| chr4 | 99231610  | 99232473  | + |
| chr4 | 132308349 | 132309221 | - |
| chr4 | 135863957 | 135864827 | - |
| chr4 | 144542550 | 144543432 | + |
| chr4 | 160364606 | 160365479 | + |
| chr4 | 175594684 | 175595581 | + |
| chr5 | 20179960  | 20180854  | + |
| chr5 | 34421366  | 34422239  | - |
| chr5 | 42834271  | 42835144  | - |
| chr5 | 42931194  | 42931678  | + |
| chr5 | 79706001  | 79706874  | - |
| chr5 | 80470850  | 80471722  | + |
| chr5 | 145442437 | 145443284 | - |
| chr5 | 152358180 | 152359046 | + |
| chr5 | 154072994 | 154073884 | - |
| chr5 | 155811614 | 155812510 | - |
| chr5 | 164544075 | 164544925 | + |
| chr5 | 176945381 | 176946277 | + |
| chr6 | 65689809  | 65690680  | - |
| chr6 | 66482360  | 66483256  | - |
| chr6 | 73459395  | 73460248  | + |
| chr6 | 81440742  | 81441615  | + |
| chr6 | 85485885  | 85486778  | - |
| chr6 | 145133108 | 145133989 | + |
| chr6 | 157900407 | 157901278 | - |
| chr7 | 2428388   | 2429259   | - |
| chr7 | 30509034  | 30509894  | - |
| chr7 | 37584110  | 37584982  | - |
| chr7 | 64143949  | 64144837  | - |
| chr7 | 78832666  | 78833538  | + |
| chr7 | 89545124  | 89545997  | - |
| chr7 | 93869864  | 93870757  | - |
| chr7 | 97597744  | 97598618  | + |
| chr7 | 100718143 | 100719043 | + |
| chr7 | 137205564 | 137206459 | + |
| chr7 | 141962353 | 141963243 | + |
| chr7 | 153244679 | 153245552 | - |
| chr8 | 5591426   | 5592257   | + |
| chr8 | 13767314  | 13768182  | - |
| chr8 | 29541987  | 29542887  | + |
| chr8 | 39618139  | 39619008  | - |
| chr8 | 46019600  | 46020470  | + |
| chr8 | 54089877  | 54090774  | + |
| chr8 | 124965592 | 124966462 | + |
| chr8 | 134288114 | 134289034 | + |
| chr8 | 134378504 | 134379372 | - |

|       |           |           |   |
|-------|-----------|-----------|---|
| chr9  | 3110324   | 3111220   | - |
| chr9  | 104394521 | 104395392 | - |
| chr9  | 111591784 | 111592657 | + |
| chr9  | 118116845 | 118117718 | - |
| chr9  | 122809057 | 122809945 | + |
| chr10 | 37007972  | 37008851  | - |
| chr10 | 45175393  | 45176261  | - |
| chr10 | 51580893  | 51581765  | - |
| chr10 | 53517584  | 53518450  | + |
| chr10 | 92912284  | 92913158  | - |
| chr10 | 94939164  | 94940060  | - |
| chr11 | 26316119  | 26316989  | - |
| chr11 | 37135432  | 37136317  | + |
| chr11 | 38784968  | 38785851  | + |
| chr11 | 67681787  | 67682660  | - |
| chr11 | 100031208 | 100032063 | + |
| chr12 | 34110212  | 34111112  | + |
| chr12 | 55255985  | 55256861  | + |
| chr12 | 74259974  | 74260871  | + |
| chr12 | 87578803  | 87579676  | - |
| chr12 | 125499323 | 125500131 | + |
| chr12 | 125974130 | 125975029 | + |
| chr13 | 22983460  | 22984463  | - |
| chr13 | 24646276  | 24647145  | + |
| chr13 | 58241108  | 58241973  | + |
| chr13 | 95430298  | 95431194  | - |
| chr14 | 23944073  | 23944952  | - |
| chr14 | 47529907  | 47530771  | + |
| chr14 | 70539162  | 70540034  | + |
| chr14 | 82285575  | 82286448  | + |
| chr14 | 93809245  | 93810143  | - |
| chr14 | 96421919  | 96422792  | - |
| chr14 | 106732833 | 106733722 | + |
| chr16 | 65813156  | 65814052  | + |
| chr17 | 7168880   | 7169774   | + |
| chr17 | 27181224  | 27182097  | - |
| chr17 | 35341379  | 35342251  | + |
| chr17 | 41341831  | 41342685  | - |
| chr17 | 44340426  | 44341299  | + |
| chr17 | 53748065  | 53748937  | + |
| chr17 | 78082075  | 78082947  | - |
| chr18 | 14796667  | 14797496  | - |
| chr18 | 14809000  | 14809821  | - |
| chr18 | 64144672  | 64145568  | + |
| chr19 | 9763869   | 9764752   | + |
| chr19 | 20692433  | 20693313  | + |

|       |           |           |   |
|-------|-----------|-----------|---|
| chr19 | 34797632  | 34798228  | - |
| chr19 | 36736030  | 36736895  | + |
| chr21 | 13426517  | 13427330  | + |
| chr22 | 21071693  | 21072588  | + |
| chr22 | 36203145  | 36203924  | - |
| chr22 | 42498284  | 42499175  | - |
| chrX  | 6355226   | 6356116   | - |
| chrX  | 6567091   | 6567987   | - |
| chrX  | 8153787   | 8154681   | + |
| chrX  | 14848131  | 14849029  | + |
| chrX  | 36662040  | 36662920  | + |
| chrX  | 43028039  | 43028913  | - |
| chrX  | 58152151  | 58153049  | - |
| chrX  | 58444869  | 58445755  | - |
| chrX  | 75571978  | 75572791  | + |
| chrX  | 76010642  | 76011509  | + |
| chrX  | 76822154  | 76823051  | - |
| chrX  | 80205526  | 80206102  | - |
| chrX  | 81560681  | 81561553  | + |
| chrX  | 90854488  | 90855358  | + |
| chrX  | 135023852 | 135024722 | + |
| chrX  | 149552503 | 149553378 | - |
| chrX  | 149926119 | 149926994 | + |
| chrY  | 4436932   | 4437804   | + |
| chrY  | 19058771  | 19059642  | + |
| chrY  | 22110338  | 22111231  | - |
| chrY  | 22475175  | 22476068  | + |
